# Supplementary material for: Descending networks transform command signals into population motor control
Source: PubMed Central journal article supplement (PMC11186778; doi:10.1038/s41586-024-07523-9), 2024-06-05
Supplement: 41586_2024_7523_MOESM1_ESM.pdf [file 41586_2024_7523_MOESM1_ESM.pdf]

---

**Supplementary information**

---

**Descending networks transform command signals into population motor control**

---

In the format provided by the authors and unedited

Supplementary Information  
for Braun, Hurtak et al., *Nature* 2024

# Descending networks transform command signals into population motor control

Jonas Braun<sup>\*1</sup>, Femke Hurtak<sup>\*1</sup>, Sibongweniso Wang-Chen<sup>1</sup>, and Pavan Ramdya<sup>1†</sup>

<sup>1</sup> Neuroengineering Laboratory, Brain Mind Institute & Interfaculty Institute of Bioengineering, EPFL, Lausanne, Switzerland

\* equal contribution

† corresponding author: [pavan.ramdya@epfl.ch](mailto:pavan.ramdya@epfl.ch)

## Table of Contents

|                                                                                                                                                           |   |
|-----------------------------------------------------------------------------------------------------------------------------------------------------------|---|
| Supplementary Information Tables .....                                                                                                                    | 3 |
| <b>Supplementary Table 1</b> - Transgenic fly lines generated in this study.....                                                                          | 3 |
| <b>Supplementary Table 2</b> - SpGAL4 fly lines used in this study .....                                                                                  | 3 |
| <b>Supplementary Table 3</b> - List of antibodies used for tissue staining.....                                                                           | 3 |
| <b>Supplementary Table 4</b> - Parameters used for behavior classification.....                                                                           | 3 |
| <b>Supplementary Table 5</b> - Exact p-values for statistical tests in headless animal<br>experiments .....                                               | 3 |
| <b>Supplementary Table 6</b> - Exact p-values for statistical tests in tibia-tarsus leg amputation<br>animal experiments .....                            | 3 |
| <b>Supplementary Table 7</b> - Acronyms for the brain neuropils.....                                                                                      | 3 |
| Supplementary Tables .....                                                                                                                                | 4 |
| <b>Supplementary Table 8</b> - DN cluster analysis.....                                                                                                   | 4 |
| <b>Sheet 1:</b> DN cluster behaviors.....                                                                                                                 | 4 |
| <b>Sheet 2:</b> DN cluster VNC projections.....                                                                                                           | 4 |
| <b>Sheet 3:</b> Investigated DN clusters.....                                                                                                             | 4 |
| <b>Sheet 4:</b> Equivalence DN names and root id.....                                                                                                     | 4 |
| <b>Sheet 5:</b> DN literature aggregation.....                                                                                                            | 4 |
| <b>Sheet 6:</b> Connectivity statistics.....                                                                                                              | 4 |
| Supplementary Videos .....                                                                                                                                | 5 |
| <b>Supplementary Video 1:</b> DN-driven behavior and trial-averaged GNG-DN population<br>activity.....                                                    | 5 |
| <b>Supplementary Video 2:</b> Comparing GNG-DN population activity for DN-driven versus<br>natural behaviors.....                                         | 5 |
| <b>Supplementary Video 3:</b> DN-driven behavioral responses of animals that are intact,<br>headless, or headless without ground contact.....             | 5 |
| <b>Supplementary Video 4:</b> Broadcaster DN-driven behavioral responses of animals that<br>are intact, headless, or headless without ground contact..... | 5 |
| <b>Supplementary Video 5:</b> Standalone DN-driven behavioral responses of animals that are<br>intact, headless, or headless without ground contact.....  | 5 |
| <b>Supplementary Video 6:</b> DN-driven behavioral responses to optogenetic stimulation for<br>intact and hindleg amputated animals.....                  | 5 |

## Supplementary Information Tables

*Available in the pdf file 'Supplementary Information'.*

**Supplementary Table 1** - Transgenic fly lines generated in this study

**Supplementary Table 2** - SpGAL4 fly lines used in this study

**Supplementary Table 3** - List of antibodies used for tissue staining

**Supplementary Table 4** - Parameters used for behavior classification.

**Supplementary Table 5** - Exact p-values for statistical tests in headless animal experiments

**Supplementary Table 6** - Exact p-values for statistical tests in tibia-tarsus leg amputation animal experiments

**Supplementary Table 7** - Acronyms for the brain neuropils

## Supplementary Tables

Available in the Excel spreadsheet 'Supplementary Table 8'.

### **Supplementary Table 8 - DN cluster analysis**

**Sheet 1:** DN cluster behaviors.

A list showing which DNs are in which particular cluster.

**Sheet 2:** DN cluster VNC projections.

VNC projections for known DNs. Aside from MDN, these data were obtained from Cheong *et al.*, 2023.

**Sheet 3:** Investigated DN clusters.

A subset of sheet 1 showing the cluster associations for DNs investigated using optogenetics in this study: DNp09, aDN2, MDN, aDN1, DNa01, DNa02, DNb02, DNg14 and Mute.

**Sheet 4:** Equivalence DN names and root id.

List of DNs, providing the known names for the root ids used in FAFB.

**Sheet 5:** DN literature aggregation.

Reported behavioral phenotypes for DNs, including citations.

**Sheet 6:** Connectivity statistics.

Connectivity statistics in the DN-DN network for reported neurons.

## Supplementary Videos

### **Supplementary Video 1:** DN-driven behavior and trial-averaged GNG-DN population activity

For (bottom) behaviors driven by laser stimulation of (Part 1) DNp09, (Part 2) aDN2, (Part 3) MDN, (Part 4) control with no DN, (Part 5) DNp09 with T1 resected, shown are (top) stimulus-triggered averages of neural activity upon laser stimulation. Video shows  $\Delta F/F$  processed GCaMP6s fluorescence. Red circle indicates laser stimulation. First four parts show flies from Figure 2b-d. For part 5, note that the most dorsal (top) part in the video of control fly 1 is just outside the cervical connective. Thus, observed changes over time are likely due to under-constrained motion correction outside of the cervical connective.

### **Supplementary Video 2:** Comparing GNG-DN population activity for DN-driven versus natural behaviors.

For (bottom) behaviors in the same flies driven either (left) by laser stimulation of (Part 1) DNp09, (Part 2) aDN2, (Part 3) MDN, or (right) (Part 1) spontaneously, (Part 2) vapor-puff stimulation, (Part 3) spontaneously on a cylindrical treadmill, shown are (top) Stimulus-triggered averages of neural activity. Video shows  $\Delta F/F$  processed GCaMP6s fluorescence. Red circle indicates laser stimulation. White circle indicates spontaneous/puff-driven behavior detection.

### **Supplementary Video 3:** DN-driven behavioral responses of animals that are intact, headless, or headless without ground contact.

Responses to optogenetic stimulation of (Part 1) DNp09, (Part 2) aDN2, (Part 3) MDN for three flies (one animal per column). The same animal is studied intact on the spherical treadmill (top), headless on the spherical treadmill (middle), and headless while hanging without ground contact (bottom). Red circles indicate optogenetic laser stimulation.

### **Supplementary Video 4:** Broadcaster DN-driven behavioral responses of animals that are intact, headless, or headless without ground contact.

Responses to optogenetic stimulation of (Part 1) DNb02, (Part 2) DNp42, (Part 3) DNa01, (Part 4) DNa02, (Part 5) aDN1 for three flies (one animal per column). Animals are studied intact on the spherical treadmill (top), headless on the spherical treadmill (middle), or headless while hanging without ground contact (bottom, except for DNp42). Red circles indicate optogenetic laser stimulation.

### **Supplementary Video 5:** Standalone DN-driven behavioral responses of animals that are intact, headless, or headless without ground contact.

Responses to optogenetic stimulation of (Part 1) DNg14, (Part 2) oviDN, (Part 3) DNg11, (Part 4) mute for three flies (one animal per column). Animals are studied intact on the spherical treadmill (top), headless on the spherical treadmill (middle), or headless while hanging without ground contact (bottom). Red circles indicate optogenetic laser stimulation.

### **Supplementary Video 6:** DN-driven behavioral responses to optogenetic stimulation for intact and hindleg amputated animals.

Behavioral responses of (top) intact, or (bottom) amputated animals during optogenetic stimulation of (Part 1) MDN with bilateral amputation of the hindlegs, (Part 2) DNp09 with bilateral amputation of the front legs, (Part 3) DNp09 with bilateral amputation of the midlegs, (Part 4) DNp09 with bilateral amputation of the front legs. Three flies are shown per

condition (columns). Amputations are at the tibia-tarsus joints. Red circles indicate optogenetic laser stimulation.

## Supplementary Tables

| ID | Chromosome X                | Chromosome II                                                         | Chromosome III                                         |
|----|-----------------------------|-----------------------------------------------------------------------|--------------------------------------------------------|
| 1  |                             | 20xUAS-CsChr.mVenus (attP40),<br>13xLexAop-opGCaMP6s<br>(su(Hw)attP5) | DfdLexA / TM6B                                         |
| 2  |                             | 20xUAS-CsChr.mVenus (attP40),<br>13xLexAop-opGCaMP6s<br>(su(Hw)attP5) | 13xLexAop-CD4-tdTomato<br>(VK00033),<br>DfdLexA / TM6B |
| 3  |                             | LexOp-myr-TdTomato / CyO                                              | DfdLexA / TM6B                                         |
| 4  |                             | LexOP-H2B::mCherry / CyO                                              | DfdLexA / TM6B                                         |
| 5  |                             | LexAop-GtACR1 / CyO                                                   | DfdLexA / TM6B                                         |
| 6  | 20xUAS-CsChr.[mVenus]attP18 | VT023490-p65.AD                                                       | VT44845.GAL4DBD                                        |
| 7  | 20xUAS-CsChr.[mVenus]attP18 | R76F12-AD                                                             | R18C11-DBD                                             |
| 8  | 20xUAS-CsChr.[mVenus]attP18 | VT023490-p65.AD                                                       | R38F04-GAL4.DBD                                        |

Supplementary Table 1: Transgenic fly lines generated in this study.

| DN    | Split name | Ref. | Source Stock  | Stock n° | AD               | DBD               |
|-------|------------|------|---------------|----------|------------------|-------------------|
| MDN   | SS03131    | [1]  | Janelia       | n.a.     | VT023490-p65.AD  | VT44845.GAL4DBD   |
| aDN2  | n.a.       | [2]  | Julie Simpson | n.a.     | R76F12-AD        | R18C11-DBD        |
| DNp09 | SS01540    | [3]  | Bloomington   | 75903    | VT023490-p65.AD  | R38F04-GAL4.DBD   |
| DNa01 | SS00731    | [4]  | Bloomington   | 75862    | R22C05-p65.AD    | R56G08GAL4.DBD    |
| DNa02 | SS00730    | [4]  | Janelia       | n.a.     | 75C10-p65ADZp    | 87D07-ZpGdbd      |
| aDN1  | n.a.       | [2]  | Julie Simpson | n.a.     | 18C11-p65AD      | R71D01-DBD        |
| Web   | SS41434    | [5]  | Janelia       | n.a.     | VT023750-p65ADZp | VT043284-ZpGDBD   |
| DNb02 | SS01600    | [4]  | Bloomington   | 75901    | R59B10-p65.AD    | R21F05GAL4.DBD    |
| Mute  | SS42606    | [5]  | Janelia       | n.a.     | 26C03-p65ADZp    | 84D10-ZpGDBD      |
| DNp24 | SS01046    | [4]  | Bloomington   | 75821    | VT048835-p65.AD  | R24C07GAL4.DBD    |
| DNg30 | SS02378    | [4]  | Bloomington   | 75872    | R61A01-p65.AD    | R13B05GAL4.DBD    |
| DNg14 | SS04158    | [4]  | Bloomington   | 75812    | R53D12-p65.AD    | VT018689GAL4.DBD  |
| DNg11 | SS01550    | [4]  | Bloomington   | 75949    | VT037583-p65.AD  | VT025598GAL4.DBD  |
| oviDN | SS46540    | [6]  | Bloomington   | 86832    | VT050660-p65.AD  | VT028160-GAL4.DBD |
| DNb01 | SS02383    | [4]  | Bloomington   | 75888    | VT013121-p65.AD  | R45H03-GAL4.DBD   |
| DNg16 | SS01543    | [4]  | Bloomington   | 75920    | VT043288-p65.AD  | VT028153GAL4.DBD  |
| DNp42 | SS57807    | [7]  | Bloomington   | 87282    | R32A04-p65.AD    | VT033636-GAL4.DBD |

Supplementary Table 2: SpGAL4 fly lines used in this study.

| figure | type | AB name                       | dilution | company                        | AB ID                   |
|--------|------|-------------------------------|----------|--------------------------------|-------------------------|
| a,b,c  | 1°   | Anti-Bruchpilot (mouse) NC82  | 1:20     | Dev. Studies<br>Hybridoma Bank | NC82 1ml<br>supernatant |
| a,c    | 1°   | GFP Tag Rabbit                | 1:500    | ThermoFisher                   | G10362                  |
| a,b,c  | 2°   | Goat anti-Mouse Alexa 633     | 1:500    | ThermoFisher                   | A21052                  |
| a,c    | 2°   | Goat anti-Rabbit Alexa 488    | 1:500    | ThermoFisher                   | A11008                  |
| b      | 1°   | Living Colors DsRed           | 1:500    | Takara                         | 632496                  |
| b      | 1°   | Chicken to GFP Anti-GFP       | 1:1000   | abcam                          | ab13970                 |
| b      | 2°   | Goat Anti-Rabbit (Cy3)        | 1:500    | abcam                          | ab6939                  |
| b      | 2°   | Goat Anti-Chicken (Alexa 488) | 1:500    | abcam                          | ab150169                |

Supplementary Table 3: List of antibodies used for immunofluorescence tissue staining in [Extended Data Fig. 1](#).

| Behavior            | $v_{abs}$ (mm/s) | $v_{forw}$ (mm/s) | fr. leg height | ME front    | ME mid      | ME hind     |
|---------------------|------------------|-------------------|----------------|-------------|-------------|-------------|
| Rest                | $\leq 0.75$      | n.a.              | $> 0$          | $\leq 0.75$ | $\leq 0.75$ | $\leq 0.75$ |
| Forward walk        | n.a.             | $> 1$             | n.a.           | n.a.        | n.a.        | n.a.        |
| Backward walk       | n.a.             | $\leq -1$         | n.a.           | n.a.        | n.a.        | n.a.        |
| Anterior grooming 1 | $\leq 0.75$      | n.a.              | $\leq 0$       | n.a.        | $\leq 0.75$ | $\leq 0.75$ |
| Anterior grooming 2 | $\leq 0.75$      | n.a.              | $> 0$          | $> 0.75$    | $\leq 0.75$ | $\leq 0.75$ |
| Posterior grooming  | $\leq 0.75$      | n.a.              | $> 0$          | $\leq 0.75$ | n.a.        | $> 0.75$    |

Supplementary Table 4: Parameters used for behavior classification.

| Figure                | GAL4             | Variable       | Comparison        | N   | P-value |
|-----------------------|------------------|----------------|-------------------|-----|---------|
| Figure 4b             | DNp09            | forw. vel.     | intact/headless   | 5   | 0.006   |
| Figure 4b             | DNp09            | forw. prob.    | intact/headless   | 5   | 0.006   |
| Figure 4c             | aDN2             | forw. vel.     | intact/headless   | 5   | 0.018   |
| Figure 4c             | aDN2             | groom prob.    | intact/headless   | 5   | 0.006   |
| Figure 4d             | MDN              | forw. vel.     | intact/headless   | 5   | 0.500   |
| Figure 4d             | MDN              | back prob.     | intact/headless   | 5   | 0.265   |
| Figure 4e             | control          | forw. vel.     | intact/headless   | 5   | 0.500   |
| Figure 4e             | control          | rest prob.     | intact/headless   | 5   | 0.018   |
| Figure 4f             | DNp09 v. control | abd. contr.    | headless/headless | 5   | 0.006   |
| Figure 4g             | aDN2 v. control  | fr. leg appr.  | headless/headless | 5   | 0.030   |
| Figure 5f             | DNb02            | turn vel.      | intact/headless   | 3/7 | 0.001   |
| Figure 5f             | control          | turn vel.      | intact/headless   | 5   | 0.047   |
| Figure 5f             | DNb02 v. control | turn vel.      | headless/headless | 7/5 | 0.313   |
| Figure 5g             | DNg14            | abd. dip       | intact/headless   | 9   | 0.144   |
| Figure 5g             | control          | abd. dip       | intact/headless   | 5   | 0.072   |
| Figure 5g             | DNg14 v. control | abd. dip       | headless/headless | 9/5 | 0.003   |
| Extended Data Fig. 5a | DNp42            | forw. vel      | intact/headless   | 3   | 0.040   |
| Extended Data Fig. 5a | control          | forw. vel      | intact/headless   | 3   | 0.040   |
| Extended Data Fig. 5a | DNp42 v. control | forw. vel      | headless/headless | 3   | 0.191   |
| Extended Data Fig. 5b | aDN1             | fr. leg motion | intact/headless   | 5   | 0.002   |
| Extended Data Fig. 5b | control          | fr. leg motion | intact/headless   | 5   | 0.006   |
| Extended Data Fig. 5b | aDN1 v. control  | fr. leg motion | headless/headless | 5   | 0.006   |
| Extended Data Fig. 5b | aDN1             | FeTi angle     | intact/headless   | 5   | 0.008   |
| Extended Data Fig. 5b | control          | FeTi angle     | intact/headless   | 5   | 0.417   |
| Extended Data Fig. 5b | aDN1 v. control  | FeTi angle     | headless/headless | 5   | 0.148   |
| Extended Data Fig. 5b | aDN1             | fr. leg appr.  | intact/headless   | 5   | 0.149   |
| Extended Data Fig. 5b | control          | fr. leg appr.  | intact/headless   | 5   | 0.072   |
| Extended Data Fig. 5b | aDN1 v. control  | fr. leg appr.  | headless/headless | 5   | 0.030   |
| Extended Data Fig. 5c | DNa01            | turn vel.      | intact/headless   | 6   | 0.003   |
| Extended Data Fig. 5c | control          | turn vel.      | intact/headless   | 5   | 0.047   |
| Extended Data Fig. 5c | DNa01 v. control | turn vel.      | headless/headless | 6/5 | 0.206   |
| Extended Data Fig. 5c | DNa01            | side vel.      | intact/headless   | 6   | 0.003   |
| Extended Data Fig. 5c | control          | side vel.      | intact/headless   | 5   | 0.047   |
| Extended Data Fig. 5c | DNa01 v. control | side vel.      | headless/headless | 6/5 | 0.392   |
| Extended Data Fig. 5d | DNb02            | turn vel.      | intact/headless   | 3/7 | 0.001   |
| Extended Data Fig. 5d | control          | turn vel.      | intact/headless   | 5   | 0.047   |
| Extended Data Fig. 5d | DNb02 v. control | turn vel.      | headless/headless | 7/5 | 0.313   |
| Extended Data Fig. 5d | DNb02            | forw. vel.     | intact/headless   | 3/7 | 0.028   |
| Extended Data Fig. 5d | control          | forw. vel.     | intact/headless   | 5   | 0.500   |
| Extended Data Fig. 5d | DNb02 v. control | forw. vel.     | headless/headless | 7/5 | 0.313   |
| Extended Data Fig. 5e | DNa02            | turn vel.      | intact/headless   | 6   | 0.002   |
| Extended Data Fig. 5e | control          | turn vel.      | intact/headless   | 5   | 0.047   |
| Extended Data Fig. 5e | DNa02 v. control | turn vel.      | headless/headless | 6/5 | 0.158   |
| Extended Data Fig. 5e | DNa02            | side vel.      | intact/headless   | 6   | 0.003   |
| Extended Data Fig. 5e | control          | side vel.      | intact/headless   | 5   | 0.047   |
| Extended Data Fig. 5e | DNa02 v. control | side vel.      | headless/headless | 6/5 | 0.085   |
| Extended Data Fig. 6a | oviDN            | abd. dip       | intact/headless   | 3   | 0.331   |
| Extended Data Fig. 6a | control          | abd. dip       | intact/headless   | 3   | 0.191   |
| Extended Data Fig. 6a | oviDN v. control | abd. dip       | headless/headless | 3   | 0.040   |
| Extended Data Fig. 6b | DNg11            | TiTa angle     | intact/headless   | 6   | 0.468   |
| Extended Data Fig. 6b | control          | TiTa angle     | intact/headless   | 3   | 0.040   |
| Extended Data Fig. 6b | DNg11 v. control | TiTa angle     | headless/headless | 6/3 | 0.014   |
| Extended Data Fig. 6c | Mute             | ovi. ext.      | intact/headless   | 3   | 0.500   |
| Extended Data Fig. 6c | control          | ovi. ext.      | intact/headless   | 5   | 0.338   |
| Extended Data Fig. 6c | Mute v. control  | ovi. ext.      | headless/headless | 3/5 | 0.117   |
| Extended Data Fig. 6d | DNg14            | abd. dip       | intact/headless   | 9   | 0.144   |
| Extended Data Fig. 6d | control          | abd. dip       | intact/headless   | 5   | 0.072   |
| Extended Data Fig. 6d | DNg14 v. control | abd. dip       | headless/headless | 9/5 | 0.003   |

Supplementary Table 5: Exact p-values for statistical tests in headless animal experiments.

| GAL4             | Legs amputated | Comparison          | N    | P-value |
|------------------|----------------|---------------------|------|---------|
| MDN              | hind           | intact/amputated    | 4/5  | 0.010   |
| control          | hind           | intact/amputated    | 10/3 | 0.466   |
| MDN v. control   | hind           | amputated/amputated | 4/5  | 0.068   |
| DNp09            | hind           | intact/amputated    | 3/3  | 0.191   |
| control          | hind           | intact/amputated    | 10/3 | 0.466   |
| DNp09 v. control | hind           | amputated/amputated | 3/3  | 0.040   |
| DNp09            | middle         | intact/amputated    | 3/4  | 0.026   |
| control          | middle         | intact/amputated    | 10/3 | 0.336   |
| DNp09 v. control | middle         | amputated/amputated | 3/4  | 0.026   |
| DNp09            | front          | intact/amputated    | 3/4  | 0.026   |
| control          | front          | intact/amputated    | 10/3 | 0.075   |
| DNp09 v. control | front          | amputated/amputated | 3/4  | 0.026   |

Supplementary Table 6: Exact p-values for statistical tests in tibia-tarsus leg amputation animal experiments ([Extended Data Fig. 10](#)).

| <b>Acronym</b> | <b>Neuropil</b>                             | <b>Region</b>            |
|----------------|---------------------------------------------|--------------------------|
| AL             | antennal lobe                               | Antennal Lobe            |
| AME            | accessory medulla                           | Optic Lobe               |
| AMMC           | antennal mechanosensory and motor center    | Periesophageal Neuropils |
| AOTU           | anterior optic tubercle                     | Ventrolateral Neuropils  |
| ATL            | antler                                      | Inferior Neuropils       |
| AVLP           | anterior VLP (ventrolateral protocerebrum)  | Ventrolateral Neuropils  |
| BU             | bulb                                        | Lateral Complex          |
| CAN            | cantle                                      | Periesophageal Neuropils |
| CRE            | crepine                                     | Inferior Neuropils       |
| EPA            | epaulette                                   | Ventromedial Neuropils   |
| FB             | fanshaped body                              | Central Complex          |
| FLA            | flange                                      | Periesophageal Neuropils |
| GA             | gall                                        | Lateral Complex          |
| GNG            | gnathal ganglia                             | Gnathal Ganglia          |
| GOR            | gorget                                      | Ventromedial Neuropils   |
| IB             | inferior bridge                             | Inferior Neuropils       |
| ICL            | inferior clamp                              | Inferior Neuropils       |
| IPS            | inferior posterior slope                    | Ventromedial Neuropils   |
| LAL            | lateral accessory lobe                      | Lateral Complex          |
| LH             | lateral horn                                | Lateral Horn             |
| LOP            | lobula plate                                | Optic Lobe               |
| LO             | lobula                                      | Optic Lobe               |
| MB_CA          | pedunculus                                  | Mushroom Body            |
| MB_ML          | vertical lobe                               | Mushroom Body            |
| MB_PED         | medial lobe                                 | Mushroom Body            |
| MB_VL          | calyx                                       | Mushroom Body            |
| NO             | noduli                                      | Central Complex          |
| OCG            | ocellar ganglion                            | Ocelli                   |
| PB             | fanshaped body                              | Central Complex          |
| PLP            | posteriorlateral protocerebrum              | Ventrolateral Neuropils  |
| PRW            | prow                                        | Periesophageal Neuropils |
| PVLP           | posterior VLP (ventrolateral protocerebrum) | Ventrolateral Neuropils  |
| SAD            | saddle                                      | Periesophageal Neuropils |
| SCL            | superior clamp                              | Inferior Neuropils       |
| SIP            | superior intermediate protocerebrum         | Superior Neuropils       |
| SLP            | superior lateral protocerebrum              | Superior Neuropils       |
| SMP            | superior medial protocerebrum               | Superior Neuropils       |
| SPS            | superior posterior slope                    | Ventromedial Neuropils   |
| UNASGD         | unassigned                                  |                          |
| VES            | vest                                        | Ventromedial Neuropils   |
| WED            | wedge                                       | Ventrolateral Neuropils  |

Supplementary Table 7: Acronyms for the brain neuropils used in [Extended Data Fig. 7](#) based on ref. [8]

## Supplementary Discussion

**Alternative mechanisms for DN recruitment** In this work we highlight that direct synaptic connections between DNs are sufficient to explain the recruitment of DN populations by command-like DNs. However, there are other mechanisms that may contribute in parallel.

The first additional mechanism is via ascending feedback to the brain. Interestingly, the GNG receives a large number of inputs from ascending neurons (ANs) that project from the VNC to the brain [9, 10]. Among these are a set of ANs which play a role in the decision between locomotion and feeding [11]. Connections from ANs may thus allow DNs to integrate information from the VNC to regulate switching between actions. DN-DN recruitment might also potentially arise indirectly via a DN-AN-DN ‘zigzag’ motif that has previously been observed in low numbers in the brain connectome of *Drosophila* larvae [12] (i.e., a DN targets an AN in the VNC which then projects back to the brain targeting a different DN). In the adult, ANs encompass 17% of all DN post-synaptic partners in the VNC [13] and 10% of all DN pre-synaptic partners in the brain. Although our experiments in headless animals cannot test the contribution of ANs (decapitation eliminates both DN-DN and putative DN-AN-DN connections), our VNC resection experiments show that ANs are not required for DN recruitment. These connections are far less numerous than direct DN-DN connectivity in the larval brain. Efforts aiming to bridge the existing brain and VNC connectomes [8, 14, 15] and to generate complete adult nervous system connectomes will further reveal the relative contribution of ANs to DN recruitment.

DN recruitment might also arise even more indirectly via sensory feedback during a change in behavioral state: Active DNs may drive a new behavior, resulting in limb sensory feedback that in turn may be transmitted via ANs to influence other DNs. We would expect to see such sensory-induced DN activation in spontaneous behavior but we instead observe that, in general, fewer DNs are strongly activated during spontaneous behavior compared with during optogenetically elicited behavior. This argues that strong GNG-DN activation is a specific response to optogenetic stimulation of command-like DNs. In particular, we found that the 10 most active neurons during DNp09 stimulation are not active during spontaneous forward walking. These results, as well as those from our VNC resection experiments blocking ascending feedback to the brain, suggest that DN recruitment likely does not result from sensory feedback arising during optogenetically-induced changes in behavioral state.

We find that DNp09 stimulation elicits additional DN activity beyond what is normally seen during spontaneous walking. This suggests a distinction between DN populations becoming active during spontaneously generated, sensory-induced, and optogenetically activated walking. We note that we previously observed that a large fraction of DNs in the CRG (rather than GNG-DNs recorded in this study) become active during spontaneous and odor-evoked forward walking [16]. Thus, spontaneously generated and sensory-induced walking may principally be driven by CRG-DNs. For example, DNp09 are thought to mediate courtship-related forward walking [3]. The possibility that DNp09 is active only during specific courtship-related behavioral contexts and inactive during spontaneous walking is supported by recent electrophysiological evidence [17]. Thus, it appears that forward walking can be controlled by distinct DNs depending on the context.

**The various roles of DNs in motor control** In our work we hypothesized that DNs might each drive ‘motor primitives’ which, when composed, give rise to complete, coordinated behaviors. Beyond a direct role in motor control other DNs may be modulatory, controlling behavioral vigor or persistence. Other DNs may be inhibitory, potentially playing an important role in action selection. Finally, other DNs may have a role in ‘gating’ behaviors by increasing the excitability of downstream motor circuits.

For DNs driving specific motor actions, we propose a framework in which DNs coordinate complex behaviors by recruiting additional DNs driving simpler motor primitives. Further evidence for such a model could come from activating command-like DNs while silencing downstream DNs. For example, DNp09 is connected to and requires the actions of a large number of DNs to drive movements of the six legs for goal-directed walking during courtship [3]. Both DNp09 (for forward walking) and MDN (for backward walking) synapse upon DNa01 and DNa02, two DNs involved in turning [18, 19]. Thus, one might silence DNa01 or DNa02 to test the prediction that they control specific turning kinematics during either asymmetric forward or backward walking. Notably, we found that DNa01 and DNa02 also synapse onto other DNs. However, their activation alone (i.e., in headless animals) is not sufficient to drive turning. Thus, DNa01 and DNa02 may also sit atop the hierarchy of DN

recruitment, recruiting other DNs which control individual leg degrees of freedom. As an example of a DN controlling similarly few degrees of freedom, we found that stimulating DN<sub>g14</sub> drives lowering of the abdomen. In line with it being at lowest level in a DN hierarchy, DN<sub>g14</sub> does not have any downstream DNs, but receive inputs from twelve upstream DNs.

## References

- [1] Bidaye, S. S., Machacek, C., Wu, Y. & Dickson, B. J.. Neuronal Control of Drosophila Walking Direction. *Science* **344**, 97–101 (2014).
- [2] Hampel, S., Franconville, R., Simpson, J. H. & Seeds, A. M.. A neural command circuit for grooming movement control. *eLife* **4**, e08758 (2015).
- [3] Bidaye, S. S. *et al.* Two Brain Pathways Initiate Distinct Forward Walking Programs in Drosophila. *Neuron* **108**, 469–485 (2020).
- [4] Namiki, S. *et al.* The functional organization of descending sensory-motor pathways in Drosophila. *eLife* **7**, e34272 (2018).
- [5] Sterne, G. R., Otsuna, H., Dickson, B. J. & Scott, K.. Classification and genetic targeting of cell types in the primary taste and premotor center of the adult Drosophila brain. *eLife* **10**, e71679 (2021).
- [6] Wang, F. *et al.* Neural circuitry linking mating and egg laying in Drosophila females. *Nature* **579**, 101–105 (2020).
- [7] Huoviala, P. *et al.* Neural circuit basis of aversive odour processing in Drosophila from sensory input to descending output. *bioRxiv* 394403 (2020).
- [8] Dorkenwald, S. *et al.* Neuronal wiring diagram of an adult brain. *bioRxiv* 2023.06.27.546656 (2023).
- [9] Chen, C. *et al.* Ascending neurons convey behavioral state to integrative sensory and action selection brain regions. *Nature Neuroscience* **26**, 682–695 (2023).
- [10] Tsubouchi, A. *et al.* Topological and modality-specific representation of somatosensory information in the fly brain. *Science* **358**, 615–623 (2017).
- [11] Mann, K., Gordon, M. D. & Scott, K.. A Pair of Interneurons Influences the Choice between Feeding and Locomotion in Drosophila. *Neuron* **79**, 754–765 (2013).
- [12] Winding, M. *et al.* The connectome of an insect brain. *Science* **379**, eadd9330 (2023).
- [13] Cheong, H. S. J. *et al.* Transforming descending input into behavior: The organization of premotor circuits in the Drosophila Male Adult Nerve Cord connectome. *bioRxiv* 2023.06.07.543976 (2023).
- [14] Phelps, J. S. *et al.* Reconstruction of motor control circuits in adult Drosophila using automated transmission electron microscopy. *Cell* **184**, 759–774 (2021).
- [15] Marin, E. C. *et al.* Systematic annotation of a complete adult male Drosophila nerve cord connectome reveals principles of functional organisation. *bioRxiv* 2023.06.05.543407 (2023).
- [16] Aymanns, F., Chen, C. & Ramdya, P.. Descending neuron population dynamics during odor-evoked and spontaneous limb-dependent behaviors. *eLife* **11**, e81527 (2022).
- [17] Yang, H. H. *et al.* Fine-grained descending control of steering in walking Drosophila. *bioRxiv* 2023.10.15.562426 (2023).
- [18] Chen, C. *et al.* Imaging neural activity in the ventral nerve cord of behaving adult Drosophila. *Nature Communications* **9**, 4390 (2018).
- [19] Rayshubskiy, A. *et al.* Neural control of steering in walking Drosophila. *bioRxiv* 2020.04.04.024703 (2020).
