# Supplementary material for: Descending networks transform command signals into population motor control
Source: PubMed Central journal article supplement (PMC11186778; doi:10.1038/s41586-024-07523-9), 2024-06-05
Supplement: 41586_2024_7523_MOESM2_ESM.pdf [file 41586_2024_7523_MOESM2_ESM.pdf]

## Reporting Summary

Nature Portfolio wishes to improve the reproducibility of the work that we publish. This form provides structure for consistency and transparency in reporting. For further information on Nature Portfolio policies, see our [Editorial Policies](#) and the [Editorial Policy Checklist](#).

### Statistics

For all statistical analyses, confirm that the following items are present in the figure legend, table legend, main text, or Methods section.

n/a | Confirmed

- The exact sample size ( $n$ ) for each experimental group/condition, given as a discrete number and unit of measurement
- A statement on whether measurements were taken from distinct samples or whether the same sample was measured repeatedly
- The statistical test(s) used AND whether they are one- or two-sided  
*Only common tests should be described solely by name; describe more complex techniques in the Methods section.*
- A description of all covariates tested
- A description of any assumptions or corrections, such as tests of normality and adjustment for multiple comparisons
- A full description of the statistical parameters including central tendency (e.g. means) or other basic estimates (e.g. regression coefficient) AND variation (e.g. standard deviation) or associated estimates of uncertainty (e.g. confidence intervals)
- For null hypothesis testing, the test statistic (e.g.  $F$ ,  $t$ ,  $r$ ) with confidence intervals, effect sizes, degrees of freedom and  $P$  value noted  
*Give  $P$  values as exact values whenever suitable.*
- For Bayesian analysis, information on the choice of priors and Markov chain Monte Carlo settings
- For hierarchical and complex designs, identification of the appropriate level for tests and full reporting of outcomes
- Estimates of effect sizes (e.g. Cohen's  $d$ , Pearson's  $r$ ), indicating how they were calculated

*Our web collection on [statistics for biologists](#) contains articles on many of the points above.*

### Software and code

Policy information about [availability of computer code](#)

Data collection

Two-photon microscope images were acquired using ThorImage 3.2 software. Data synchronization was performed using ThorSync 3.2 software. Behavior images were acquired using custom Python scripts. Optogenetic stimulation was controlled using a custom Arduino 1.8.13 script.

Data analysis

Data analyses were performed using custom code written in Python 3. The code is available in the following repository: [https://github.com/NeLy-EPFL/dn\\_networks](https://github.com/NeLy-EPFL/dn_networks)  
Fiji v.2.9.0 software was used to sum z-projections of image z-stacks and to combine monochromatic images into RGB images.  
SLEAP v1.3.0 was used to perform 2D pose estimation.

For manuscripts utilizing custom algorithms or software that are central to the research but not yet described in published literature, software must be made available to editors and reviewers. We strongly encourage code deposition in a community repository (e.g. GitHub). See the Nature Portfolio [guidelines for submitting code & software](#) for further information.

## Data

Policy information about [availability of data](#)

All manuscripts must include a [data availability statement](#). This statement should provide the following information, where applicable:

- Accession codes, unique identifiers, or web links for publicly available datasets
- A description of any restrictions on data availability
- For clinical datasets or third party data, please ensure that the statement adheres to our [policy](#)

Data are available at:

[https://dataverse.harvard.edu/dataverse/dn\\_networks](https://dataverse.harvard.edu/dataverse/dn_networks)

DOI are:

<https://doi.org/10.7910/DVN/6ILOX3>

<https://doi.org/10.7910/DVN/K0WMM4>

<https://doi.org/10.7910/DVN/TZK8FA>

<https://doi.org/10.7910/DVN/INYAYV>

<https://doi.org/10.7910/DVN/HNGVGA>

These repositories include processed data required to reproduce the figures for each fly. Due to data storage limits, these do not include raw behavior camera images or raw two-photon imaging files which are available upon reasonable request. This repository includes: all behavioral and neural time series required to reproduce Figures describing experimental data; Acquisition Metadata files; Confocal images; SLEAP pose estimation model.

The female adult fly brain (FAFB) connectomics dataset from Codex (version hosted on Codex as of August 3, 2023, FlyWire materialization snapshot 630) can be found at:

<https://codex.flywire.ai/api/download>.

## Research involving human participants, their data, or biological material

Policy information about studies with [human participants or human data](#). See also policy information about [sex, gender \(identity/presentation\), and sexual orientation](#) and [race, ethnicity and racism](#).

|                                                                    |                                  |
|--------------------------------------------------------------------|----------------------------------|
| Reporting on sex and gender                                        | <input type="text" value="N/A"/> |
| Reporting on race, ethnicity, or other socially relevant groupings | <input type="text" value="N/A"/> |
| Population characteristics                                         | <input type="text" value="N/A"/> |
| Recruitment                                                        | <input type="text" value="N/A"/> |
| Ethics oversight                                                   | <input type="text" value="N/A"/> |

Note that full information on the approval of the study protocol must also be provided in the manuscript.

## Field-specific reporting

Please select the one below that is the best fit for your research. If you are not sure, read the appropriate sections before making your selection.

- Life sciences       Behavioural & social sciences       Ecological, evolutionary & environmental sciences

For a reference copy of the document with all sections, see [nature.com/documents/nr-reporting-summary-flat.pdf](https://nature.com/documents/nr-reporting-summary-flat.pdf)

## Life sciences study design

All studies must disclose on these points even when the disclosure is negative.

|             |                                                                                                                                                                                                                                                                                                                                                                                                                                                                                                                                                                                                                                                                                                                                                                                                                                                                                                                                                                                                                                                                                                                                                                                                                                                                                                                 |
|-------------|-----------------------------------------------------------------------------------------------------------------------------------------------------------------------------------------------------------------------------------------------------------------------------------------------------------------------------------------------------------------------------------------------------------------------------------------------------------------------------------------------------------------------------------------------------------------------------------------------------------------------------------------------------------------------------------------------------------------------------------------------------------------------------------------------------------------------------------------------------------------------------------------------------------------------------------------------------------------------------------------------------------------------------------------------------------------------------------------------------------------------------------------------------------------------------------------------------------------------------------------------------------------------------------------------------------------|
| Sample size | <p>Sample sizes were chosen based on convention in the field based on expected inter-animal variability from published results and pilot experiments. In total, we performed experiments with 176 flies:</p> <p>(1) 20 flies for two-photon recordings during optogenetic stimulation after the fly was walking (Fig 2). We have at least 3 samples per genotype.</p> <p>(2) 25 flies to fine-tune and characterize the optogenetic stimulation system (Supp Fig 1; 9 overlap with (1)). We have at least 3 samples per genotype.</p> <p>(3) 5 flies to examine spontaneous behavioral responses (Supp. Fig 2., 3 overlap with (1))</p> <p>(4) 6 Flies to test DN recruitment upon VNC resection (Supp. Fig. 3). We have 3 samples per genotype.</p> <p>(5) 20 flies for headless experiments (Fig. 4). We have at least 5 samples per genotype.</p> <p>(6) 69 flies to test model predictions (Fig. 5 and Supp. Figs. 6,7). We have at least 3 samples per genotype.</p> <p>(7) 35 flies to test forward and backward walking with amputated tarsi (Supp. Fig. 4). We have at least 3 samples per genotype.</p> <p>(6) 5 flies for confocal imaging (Supp. Fig. 1)</p> <p>(7) 11 flies for two-photon recordings during optogenetic responses after the fly was resting (Supp. File 1; 7 overlap with (1))</p> |
|-------------|-----------------------------------------------------------------------------------------------------------------------------------------------------------------------------------------------------------------------------------------------------------------------------------------------------------------------------------------------------------------------------------------------------------------------------------------------------------------------------------------------------------------------------------------------------------------------------------------------------------------------------------------------------------------------------------------------------------------------------------------------------------------------------------------------------------------------------------------------------------------------------------------------------------------------------------------------------------------------------------------------------------------------------------------------------------------------------------------------------------------------------------------------------------------------------------------------------------------------------------------------------------------------------------------------------------------|

|                 |                                                                                                                                                                                                                                                                                                                                                                                                                                                                                                                                                                              |
|-----------------|------------------------------------------------------------------------------------------------------------------------------------------------------------------------------------------------------------------------------------------------------------------------------------------------------------------------------------------------------------------------------------------------------------------------------------------------------------------------------------------------------------------------------------------------------------------------------|
| Data exclusions | Data from two-photon recordings of behaving flies were excluded for animals and trials in which we observed abnormal limb movements, or low vitality. Two-photon imaging data were also excluded if they suffered from optical occlusions due to tissue debris, or extreme motion artifacts resulting from animal behavior. Both of these exclusions were performed based on a quantitative scoring system. In experiments with headless flies, we only retained data from flies that were not visibly injured after decapitation (i.e., all limbs were still able to move). |
| Replication     | For the two-photon recordings in Figure 2, 3-9 replicates were recorded for each genotype.<br>For the headless experiments shown in figure 4, five replicates were recorded for each genotype. For the experiments testing model predictions in Figure 5 and Supp. Figure 3, 3-9 replicates were recorded for each genotype.<br>For other control experiments (Supp. Fig 1d-g, Supp Fig 3, Supp Fig 4,) at least 3 replicates were recorded for each genotype.                                                                                                               |
| Randomization   | Experiments were not randomized because of the automated nature of the data analysis.                                                                                                                                                                                                                                                                                                                                                                                                                                                                                        |
| Blinding        | Experimenters were not blinded in this study due to obvious behavioral phenotypes for specific genotypes during optogenetic activation. Additionally, for specific experiments, a behavioral phenotype was required to establish the health of the animals in question.                                                                                                                                                                                                                                                                                                      |

## Reporting for specific materials, systems and methods

We require information from authors about some types of materials, experimental systems and methods used in many studies. Here, indicate whether each material, system or method listed is relevant to your study. If you are not sure if a list item applies to your research, read the appropriate section before selecting a response.

### Materials & experimental systems

### Methods

| n/a                                 | Involved in the study                                           | n/a                                 | Involved in the study                           |
|-------------------------------------|-----------------------------------------------------------------|-------------------------------------|-------------------------------------------------|
| <input type="checkbox"/>            | <input checked="" type="checkbox"/> Antibodies                  | <input checked="" type="checkbox"/> | <input type="checkbox"/> ChIP-seq               |
| <input checked="" type="checkbox"/> | <input type="checkbox"/> Eukaryotic cell lines                  | <input checked="" type="checkbox"/> | <input type="checkbox"/> Flow cytometry         |
| <input checked="" type="checkbox"/> | <input type="checkbox"/> Palaeontology and archaeology          | <input checked="" type="checkbox"/> | <input type="checkbox"/> MRI-based neuroimaging |
| <input type="checkbox"/>            | <input checked="" type="checkbox"/> Animals and other organisms |                                     |                                                 |
| <input checked="" type="checkbox"/> | <input type="checkbox"/> Clinical data                          |                                     |                                                 |
| <input checked="" type="checkbox"/> | <input type="checkbox"/> Dual use research of concern           |                                     |                                                 |
| <input checked="" type="checkbox"/> | <input type="checkbox"/> Plants                                 |                                     |                                                 |

## Antibodies

### Antibodies used

Anti-Bruchpilot (mouse) NC82, Dev. Studies Hybridoma Bank (DSHB), NC82 1ml supernatant  
GFP Tag Rabbit, ThermoFisher, G10362  
Goat anti-Mouse Alexa 633, ThermoFisher, A21052  
Goat anti-Rabbit Alexa 488, ThermoFisher, A11008  
Living Colors DsRed, Takara, 632496  
Chicken to GFP Anti-GFP, abcam, ab13970  
Goat Anti-Rabbit (Cy3), abcam, ab6939  
Goat Anti-Chicken (Alexa 488), abcam, ab150169

### Validation

Primary antibodies were validated by the suppliers as follows:  
GFP Tag Rabbit (G10362) was verified by Relative expression  
Living Colors DsRed, (632496) was validated by western blot.  
Chicken to GFP (ab13970) was validated by western blot.  
No manufacturer notes are available for the validation of other primary antibodies. No additional validation was performed.  
- DSHB - <https://dshb.biology.uiowa.edu/nc82>  
- Thermofisher - <https://www.thermofisher.com/antibody/product/>  
- Takara Biomedical Technology - <https://www.takarabio.com/products/antibodies-and-elisa/fluorescent-protein-antibodies/red-fluorescent-protein-antibodies>  
- <https://www.abcam.com/products>

## Animals and other research organisms

Policy information about [studies involving animals](#); [ARRIVE guidelines](#) recommended for reporting animal research, and [Sex and Gender in Research](#)

### Laboratory animals

Female *Drosophila melanogaster* flies 3-8 days post-eclosion (dpe) from the following driver lines were used in this study:  
Split GAL4 lines (targeting DNp09, aDN2, MDN, aDN1, DNa01, DNa02, DNb02, DNg14, Mute, Web, Dnp24, DNg30, DNg11, oviDN, DNb01, DNg16, Dnp42).  
20xUAS-CsChr.mVenus (attP40), 13xLexAop-opGCaMP6s (su(Hw)attP5); DfdLexA / TM6B  
20xUAS-CsChr.mVenus (attP40), 13xLexAop-opGCaMP6s (su(Hw)attP5); 13xLexAop-CD4-tdTomato (VK00033), DfdLexA / TM6B

LexOp-myr-TdTomato / CyO; DfdLexA / TM6B  
LexOP-H2B::mCherry / CyO; DfdLexA / TM6B  
LexAop-GtACR1 / CyO; DfdLexA / TM6  
20xUAS-CsChr.[mVenus]attP18; spGAL4-AD; spGAL4-DBD (see Methods)  
PR (Phinney Ridge wild type) flies, Canton-S wild type flies

Wild animals

No wild animals were used.

Reporting on sex

All studies were performed on female flies due to their larger body size. This property facilitates neural data analysis and behavioral quantification.

Field-collected samples

No field-collected samples were used

Ethics oversight

All experiments were performed in compliance with relevant national (Switzerland) and institutional (EPFL) ethical regulations

Note that full information on the approval of the study protocol must also be provided in the manuscript.
